# Supplementary material for: Monolithic carbon xerogel with co-continuous hierarchical porosity via one-step, template- and catalyst-free hydrothermal reaction with resorcinol and formaldehyde
Source: Royal Society of Chemistry journal article supplement (doi:10.1039/c9ra00904c), 2019-01-01
Supplement: c9ra00904c1.pdf [file c9ra00904c1.pdf]

## **Electronic Supplementary Information (ESI)**

### **Monolithic Carbon Xerogels via with Co-continuous Hierarchical Porosity via One-step, Template- and Catalyst-Free Hydrothermal Reaction with Resorcinol and Formaldehyde**

Hyoung-Ju Yoon, Jae Young Lee and Jae-Suk Lee Tae-Ho Yoon\*

School of Materials Science and Engineering, Gwangju Institute of Science and Engineering, Gwangju, 61005, South Korea.

\* To whom correspondence should be addressed (thyoon@gist.ac.kr, Fax: +82-62-715-2304, Tel:+82-62-715-2307)

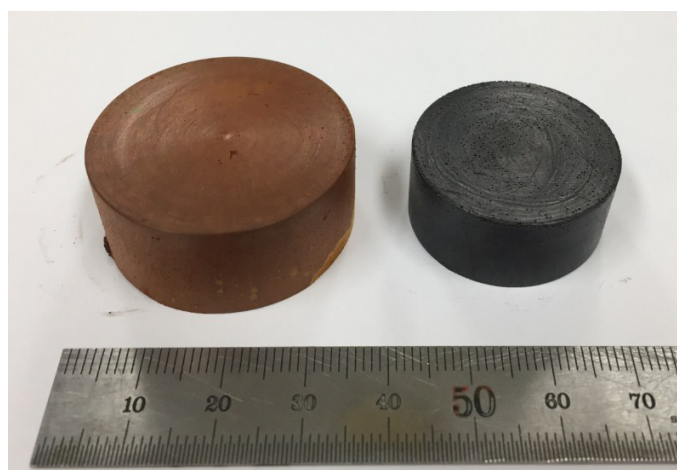

Fig. S1. Photo of monolithic RF (left) and carbon (right) xerogel.

Table S1. Characteristics of monolithic carbon xerogels at R/W=45.

| Sample | S <sup>a</sup> (m <sup>2</sup> g <sup>-1</sup> ) | V <sub>total</sub> <sup>b</sup> (cm <sup>3</sup> g <sup>-1</sup> ) | V <sub>micro</sub> <sup>c</sup> (cm <sup>3</sup> g <sup>-1</sup> ) | D <sub>p</sub> <sup>d</sup> (nm) |
|--------|--------------------------------------------------|--------------------------------------------------------------------|--------------------------------------------------------------------|----------------------------------|
| 45-2.2 | 633                                              | 0.247                                                              | 0.225(91.1%)                                                       | 1.61                             |
| 45-2.4 | 631                                              | 0.292                                                              | 0.221(75.7%)                                                       | 1.85                             |
| 45-2.6 | 623                                              | 0.352                                                              | 0.216(61.4%)                                                       | 2.26                             |
| 45-2.8 | 611                                              | 0.398                                                              | 0.209(52.5%)                                                       | 2.76                             |

<sup>a</sup>Specific surface area by BET (Brunauer-Emmett-Teller) method.

<sup>b</sup>Total pore volume obtained by total single point adsorption of the pores less than 300nm at  $P/P_0=0.99$ .

<sup>c</sup>Micro-pore volume obtained by  $t$ -plot method.

<sup>d</sup>Pore size distribution calculated by BJH(Barrett-Joyner-Halenda) method.

Table S2. Burn off ratio (%) of monolithic carbon xerogels from F/R of 2.2, 2.4, 2.6 and 2.8 at R/W=40 upon activation.

|     | 2.2 | 2.4 | 2.6  | 2.8  |
|-----|-----|-----|------|------|
| 2 h | 37  | 35  | 33   | 29   |
| 4 h | 63  | 60  | 57   | (48) |
| 6 h | 80  | 79  | (77) | (70) |

( ) : crack generation upon activation

Table S3. Burn off ratio (%) of monolithic carbon xerogels from F/R of 2.2, 2.4, 2.6 and 2.8 at R/W=45 upon activation.

|     | 2.2  | 2.4  | 2.6  | 2.8  |
|-----|------|------|------|------|
| 2 h | 32   | 30   | 29   | 27   |
| 4 h | 59   | 55   | (51) | (48) |
| 6 h | (73) | (70) | (69) | (64) |

( ) : crack generation upon activation
